# Supplementary material for: Risk of Bias in Reports of In Vivo Research: A Focus for Improvement
Source: PLoS Biol. 2015 Oct 13;13(10):e1002273. doi: 10.1371/journal.pbio.1002273 (PMC4603955; doi:10.1371/journal.pbio.1002273)
Supplement: S2 Data — (XLSX) [file pbio.1002273.s002.xlsx]

## Sheet: Sheet1
Data for Fig 2
Model	n	Randomisation			Blinding			Sample size calculation			Conflict of Interest reporting
		%	l95%	u95%	%	l95%	u95%	%	l95%	u95%	%	l95%	u95%
AlzheimersDisease	324	16.63	13.04	20.21	28.67	24.32	33.03	0	0	0	12.53	9.34	15.72
Focal	704	40.08	36.56	43.6	38.47	34.98	41.96	1.34	0.5153	2.17	5.23	3.63	6.83
Glioma	175	18.18	12.81	23.55	3.03	0.6426	5.42	1.52	-0.1863	3.22	11.11	6.73	15.49
Huntington's Disease	113	33.8	26.02	41.58	36.62	28.7	44.54	0.7042	-0.6712	2.08	19.72	13.17	26.26
ICH	72	30.56	19.92	41.2	59.72	48.39	71.05	0	0	0	12.5	4.86	20.14
Experimental Allergic Encephalomyelitis	1029	10.98	9.07	12.89	20.31	17.85	22.77	0.3887	0.0085227	0.7689	10.5	8.62	12.37
Myocardial Infarction	69	65.22	53.98	76.46	44.93	33.19	56.66	0	0	0	37.68	26.25	49.12
SCI	185	40.32	33.27	47.37	50	42.81	57.19	2.15	0.0658	4.24	22.04	16.09	28
Overall	2671	24.78	23.16	26.47	29.5	27.78	31.27	0.75	0.46	1.15	11.53	10.34	12.8
% = prevalence
l95% = lower 95% limit of estimate
u95% = upper 95% limit of estimate
