# Supplementary material for: Risk of Bias in Reports of In Vivo Research: A Focus for Improvement
Source: PLoS Biol. 2015 Oct 13;13(10):e1002273. doi: 10.1371/journal.pbio.1002273 (PMC4603955; doi:10.1371/journal.pbio.1002273)
Supplement: S5 Data — (XLSX) [file pbio.1002273.s005.xlsx]

## Sheet: Sheet1
Data for Fig 5
Institution	Randomisation				Blinding				Inclusions and Exclusions				Sample size calculation
	n	%	l95%	u95%	n	%	l95%	u95%	n	%	l95%	u95%	n	%	l95%	u95%
A	233	0.16309	0.118	0.217	274	0.124088	0.087	0.169	275	0.116364	0.081	0.16	274	0.0109489	0.002	0.032
B	151	0.0728477	0.021	0.127	175	0.171429	0.119	0.236	176	0.0909091	0.053	0.143	176	0.00568182	0.006	0.031
C	260	0.157692	0.116	0.208	280	0.235714	0.187	0.29	280	0.0714286	0.044	0.108	280	0.00357143	0.0001	0.02
D	186	0.139785	0.093	0.198	216	0.125	0.084	0.177	216	0.0462963	0.022	0.083	216	0.0509259	0.026	0.089
E	198	0.161616	0.113	0.22	220	0.2	0.149	0.259	222	0.103604	0.067	0.151	222	0	0	0.016
% = prevalence
l95% = lower 95% limit of estimate
u95% = upper 95% limit of estimate
																			0.1398	0.0582	0.1616	0.023
																			0.125	0.052	0.2	0.0225
																			0.0463	0.0367	0.1036	0.0176
																			0.0509	0.0381	0	0.0083014
